# Supplementary material
Source: PubMed Central journal article supplement (PMC6312489)
Supplement: NIHMS1505404-supplement-1.pdf [file NIHMS1505404-supplement-1.pdf]

**Supplemental Table 1** Number and percent of participants by study center

| Study Center                                              | <i>n</i> | %    |
|-----------------------------------------------------------|----------|------|
| Johns Hopkins University                                  | 89       | 6.04 |
| Michigan State University                                 | 226      | 15.3 |
| Saint Louis University                                    | 23       | 1.56 |
| University of California, Irvine                          | 44       | 2.99 |
| University of California, Los Angeles                     | 40       | 2.72 |
| University of Minnesota                                   | 51       | 3.46 |
| University of Texas at Austin/ Baylor College of Medicine | 285      | 19.4 |
| University of Texas Health Science Center at San Antonio  | 715      | 48.5 |

**Supplemental Figure 1** Ulnar length measured by caliper (A), forearm width by grid (B), and forearm circumference by an insertion ShorrTape© (C).

A

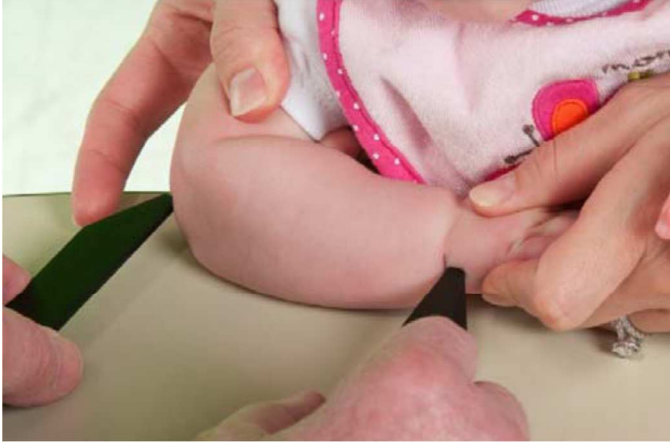

B

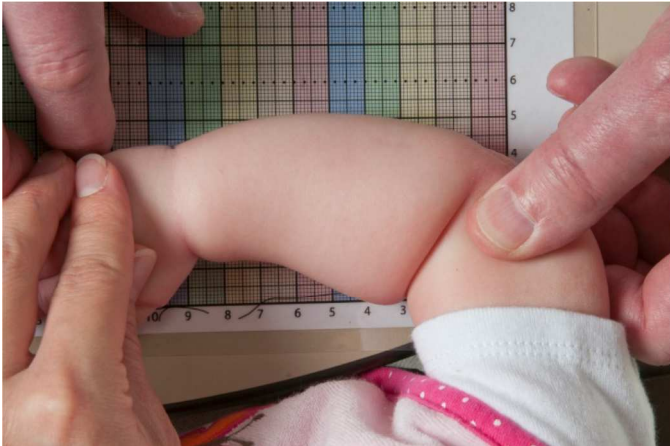

C

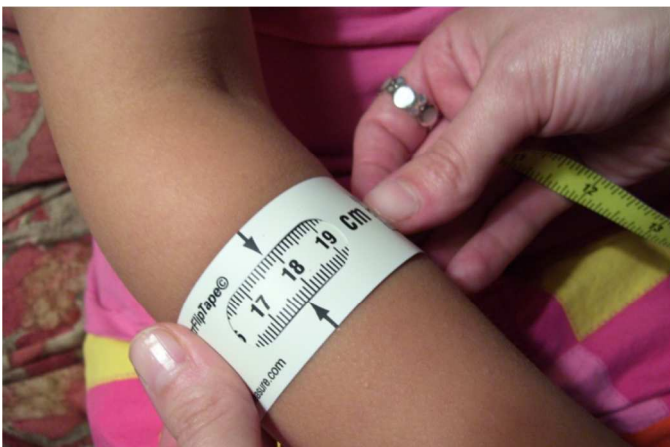

**Supplemental Table 2** Child anthropometric measurements by age, sex, and race/ethnicity in the total sample\*

|                    | <i>n</i> | Weight, kg                | Length or height, cm     | Ulnar length, cm         | Forearm width, cm       | Forearm circumference, cm |
|--------------------|----------|---------------------------|--------------------------|--------------------------|-------------------------|---------------------------|
| Total              | 1473     | 11.6 (0.1)                | 81.6 (0.5)               | 12.8 (0.1)               | 5.3 (0.02)              | 15.0 (0.1)                |
| Age, year          |          |                           |                          |                          |                         |                           |
| <1                 | 572      | 7.0 (0.2) <sup>a, †</sup> | 64.4 (0.4) <sup>a</sup>  | 10.1 (0.08) <sup>a</sup> | 4.9 (0.04) <sup>a</sup> | 13.6 (0.10) <sup>a</sup>  |
| 1-2.9              | 299      | 10.7 (0.2) <sup>b</sup>   | 79.2 (0.5) <sup>b</sup>  | 12.4 (0.09) <sup>b</sup> | 5.1 (0.04) <sup>b</sup> | 15.1 (0.11) <sup>b</sup>  |
| 2-2.9              | 190      | 14.0 (0.2) <sup>c</sup>   | 91.5 (0.6) <sup>c</sup>  | 14.2 (0.11) <sup>c</sup> | 5.4 (0.05) <sup>c</sup> | 16.1 (0.13) <sup>c</sup>  |
| 3-5.9              | 412      | 17.8 (0.2) <sup>d</sup>   | 104.6 (0.4) <sup>d</sup> | 16.3 (0.08) <sup>d</sup> | 5.6 (0.03) <sup>d</sup> | 16.8 (0.09) <sup>d</sup>  |
| Sex                |          |                           |                          |                          |                         |                           |
| Boys               | 764      | 12.0 (0.1) <sup>a</sup>   | 83.1 (0.3) <sup>a</sup>  | 13.0 (0.06) <sup>a</sup> | 5.3 (0.03) <sup>a</sup> | 15.4 (0.08) <sup>a</sup>  |
| Girls              | 709      | 11.5 (0.1) <sup>b</sup>   | 81.9 (0.3) <sup>b</sup>  | 12.7 (0.06) <sup>b</sup> | 5.2 (0.03) <sup>b</sup> | 15.0 (0.08) <sup>b</sup>  |
| Race/ethnicity     |          |                           |                          |                          |                         |                           |
| Non-Hispanic White | 296      | 12.0 (0.2) <sup>a</sup>   | 82.5 (0.4) <sup>b</sup>  | 12.7 (0.09) <sup>a</sup> | 5.3 (0.05)              | 15.3 (0.1) <sup>a</sup>   |
| Hispanic           | 662      | 11.9 (0.2) <sup>a</sup>   | 81.9 (0.4) <sup>a</sup>  | 12.7 (0.09) <sup>a</sup> | 5.4 (0.05)              | 15.3 (0.1) <sup>a</sup>   |
| Non-Hispanic Black | 384      | 12.2 (0.2) <sup>a</sup>   | 83.6 (0.4) <sup>b</sup>  | 13.3 (0.08) <sup>b</sup> | 5.3 (0.04)              | 15.4 (0.1) <sup>a</sup>   |
| Other              | 131      | 10.7 (0.3) <sup>b</sup>   | 81.0 (0.6) <sup>a</sup>  | 12.5 (0.13) <sup>a</sup> | 5.2 (0.07)              | 14.8 (0.2) <sup>b</sup>   |

\*Values are presented as means (standard errors). Group comparisons of anthropometrics were analyzed using analysis of variance test by age group with study center as a random effect; student's *t* test by sex with study center as a random effect, adjusting for age; and analysis of covariance by race/ethnicity with study center as a random effect, adjusting for age.

†Values with different superscript letters in a column are significantly different within the particular stratum (age, sex, or race/ethnicity) with *P* values <0.05, after Bonferroni-Holm adjustment for pairwise comparisons. For instance, values with superscript letters <sup>a,b</sup> and <sup>a</sup> were not significantly different, whereas values with <sup>a</sup> and <sup>b</sup> were significantly different.

**Supplemental Table 3** Intra- and inter-observer reliability of anthropometric measurements in a sub-sample of infants/children ( $n = 124$ )<sup>1</sup>

|                            | Intra-observer reliability |        |                      | Inter-observer reliability |        |                      |
|----------------------------|----------------------------|--------|----------------------|----------------------------|--------|----------------------|
|                            | $n^*$                      | CV (%) | ICC (95% CI)         | $n^*$                      | CV (%) | ICC (95% CI)         |
| Weight (kg)                | 119                        | 0.08   | 1.000 (1.000, 1.000) | 119                        | 0.24   | 1.000 (1.000, 1.000) |
| Recumbent length (cm)      | 58                         | 0.20   | 1.000 (0.999, 1.000) | 56                         | 0.53   | 0.999 (0.998, 0.999) |
| Standing height (cm)       | 66                         | 0.12   | 0.999 (0.999, 1.000) | 64                         | 0.29   | 0.999 (0.998, 0.999) |
| Ulna length (cm)           | 119                        | 0.62   | 0.999 (0.998, 0.999) | 117                        | 1.48   | 0.996 (0.994, 0.997) |
| Forearm width (cm)         | 104                        | 1.96   | 0.952 (0.930, 0.967) | 100                        | 2.16   | 0.879 (0.819, 0.919) |
| Forearm circumference (cm) | 115                        | 0.36   | 0.998 (0.998, 0.999) | 114                        | 0.43   | 0.990 (0.985, 0.993) |

CV indicates coefficient of variance; ICC, intra-class correlation coefficient, calculated using a one-way random model and absolute agreement type.

\* $n$  for length and  $n$  for height were both <124 because recumbent length and standing height were measured in infants and children aged 0-1.9 and 2-5.9 years, respectively. For other anthropometric measurements,  $n$  may be <124 due to missing values.
